# Supplementary material
Source: PubMed Central journal article supplement (PMC7469371)
Supplement: ao0c02134_si_001.pdf [file ao0c02134_si_001.pdf]

## Supporting Information

### Detection of amyloid $\beta$ oligomers with RNA aptamers in *App*<sup>NL-G-F/NL-G-F</sup> mice, a model of Arctic Alzheimer disease

Yayoi Obata,<sup>a</sup> Kazuma Murakami,<sup>\*a</sup> Taiji Kawase,<sup>b</sup> Kenji Hirose,<sup>b</sup> Naotaka Izuo,<sup>‡c</sup> Takahiko Shimizu<sup>§c</sup> and Kazuhiro Irie<sup>\*a</sup>

<sup>a</sup>Division of Food Science and Biotechnology, Graduate School of Agriculture, Kyoto University, Kyoto 606-8502, Japan.

<sup>b</sup>Nihon Waters, K.K., Tokyo 140-0001, Japan

<sup>c</sup>Department of Endocrinology, Hematology and Gerontology, Graduate School of Medicine, Chiba University, Chiba 260-8670, Japan

<sup>‡</sup>Present address: Laboratory of Pharmaceutical Therapy and Neuropharmacology, Faculty of Pharmaceutical Sciences, University of Toyama, Toyama 930-0194, Japan

<sup>§</sup>Present address: Aging Stress Response Research Project Team, National Center for Geriatrics and Gerontology, Obu 474-8511, Japan

\*Corresponding authors

murakami.kazuma.4v@kyoto-u.ac.jp (K.M.) or irie.kazuhiro.2z@kyoto-u.ac.jp (K.I.)

#### This PDF file includes:

- Figure S1
- Table S1

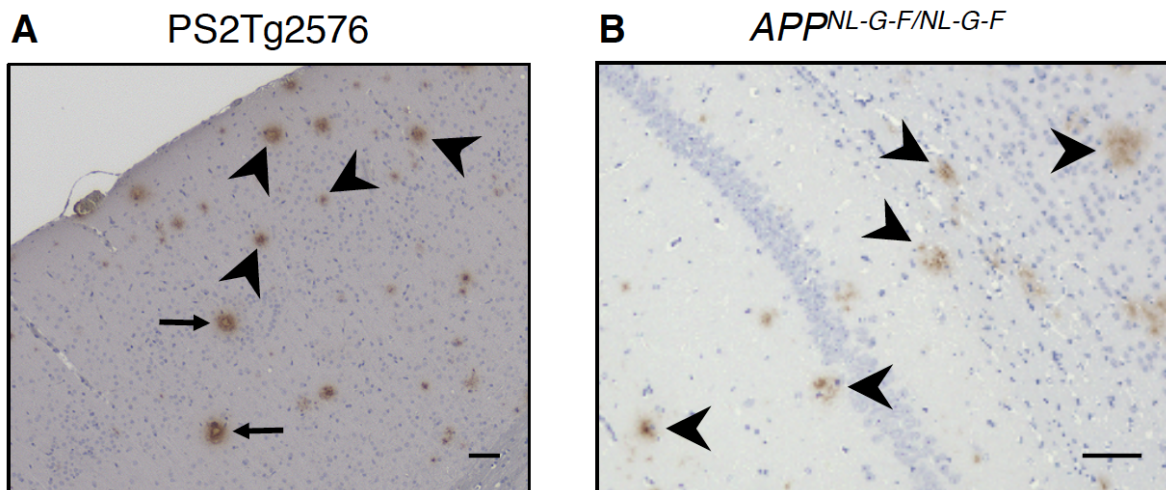

**Figure S1.** (A) Representative micrograph of diffuse aggregates (arrowheads) and senile plaques (arrows) observed in PS2Tg2576 using anti-N-terminus of the A $\beta$  (82E1) antibody (1  $\mu$ g/ml). Scale bar indicates 50  $\mu$ m. (B) Representative micrograph of diffuse aggregates (arrowheads) of *App*<sup>NL-G-F/NL-G-F</sup> using 82E1 (1  $\mu$ g/ml).

**Table S1.** The calculated and observed masses of A $\beta$ 42 and A $\beta$ 42 treated with E22P-AbD43. The calculated masses matched (*upper table*) with observed masses (*lower table*) are highlighted in yellow.

| WT-A $\beta$ 42       |        |        |         |         |         |         |         |         |         |         |         |         |         |
|-----------------------|--------|--------|---------|---------|---------|---------|---------|---------|---------|---------|---------|---------|---------|
| n                     | 1      | 2      | 3       | 4       | 5       | 6       | 7       | 8       | 9       | 10      | 11      | 12      |         |
| mass                  | 4514.1 | 9028.2 | 13542.2 | 18056.3 | 22570.4 | 27084.5 | 31598.6 | 36112.6 | 40626.7 | 45140.8 | 49654.9 | 54169.0 |         |
| z                     | 1      | 4513.1 | 9027.2  | 13541.2 | 18055.3 | 22569.4 | 27083.5 | 31597.6 | 36111.6 | 40625.7 | 45139.8 | 49653.9 | 54168.0 |
|                       | 2      | 2256.0 | 4513.1  | 6770.1  | 9027.2  | 11284.2 | 13541.2 | 15798.3 | 18055.3 | 20312.4 | 22569.4 | 24826.4 | 27083.5 |
|                       | 3      | 1503.7 | 3008.4  | 4513.1  | 6017.8  | 7522.5  | 9027.2  | 10531.8 | 12036.5 | 13541.2 | 15045.9 | 16550.6 | 18055.3 |
|                       | 4      | 1127.5 | 2256.0  | 3384.6  | 4513.1  | 5641.6  | 6770.1  | 7898.6  | 9027.2  | 10155.7 | 11284.2 | 12412.7 | 13541.2 |
|                       | 5      | 901.8  | 1804.6  | 2707.4  | 3610.3  | 4513.1  | 5415.9  | 6318.7  | 7221.5  | 8124.3  | 9027.2  | 9930.0  | 10832.8 |
|                       | 6      | 751.3  | 1503.7  | 2256.0  | 3008.4  | 3760.7  | 4513.1  | 5265.4  | 6017.8  | 6770.1  | 7522.5  | 8274.8  | 9027.2  |
|                       | 7      | 643.9  | 1288.7  | 1933.6  | 2578.5  | 3223.3  | 3868.2  | 4513.1  | 5157.9  | 5802.8  | 6447.7  | 7092.5  | 7737.4  |
|                       | 8      | 563.3  | 1127.5  | 1691.8  | 2256.0  | 2820.3  | 3384.6  | 3948.8  | 4513.1  | 5077.3  | 5641.6  | 6205.9  | 6770.1  |
|                       | 9      | 500.6  | 1002.1  | 1503.7  | 2005.2  | 2506.8  | 3008.4  | 3509.9  | 4011.5  | 4513.1  | 5014.6  | 5516.2  | 6017.8  |
|                       | 10     | 450.4  | 901.8   | 1353.2  | 1804.6  | 2256.0  | 2707.4  | 3158.8  | 3610.3  | 4061.7  | 4513.1  | 4964.5  | 5415.9  |
|                       | 11     | 409.4  | 819.7   | 1230.1  | 1640.5  | 2050.8  | 2461.2  | 2871.6  | 3282.0  | 3692.3  | 4102.7  | 4513.1  | 4923.4  |
|                       | 12     | 375.2  | 751.3   | 1127.5  | 1503.7  | 1879.9  | 2256.0  | 2632.2  | 3008.4  | 3384.6  | 3760.7  | 4136.9  | 4513.1  |
|                       | 13     | 346.2  | 693.5   | 1040.7  | 1387.9  | 1735.2  | 2082.4  | 2429.7  | 2776.9  | 3124.1  | 3471.4  | 3818.6  | 4165.8  |
|                       | 14     | 321.4  | 643.9   | 966.3   | 1288.7  | 1611.2  | 1933.6  | 2256.0  | 2578.5  | 2900.9  | 3223.3  | 3545.8  | 3868.2  |
|                       | 15     | 299.9  | 600.9   | 901.8   | 1202.7  | 1503.7  | 1804.6  | 2105.6  | 2406.5  | 2707.4  | 3008.4  | 3309.3  | 3610.3  |
|                       | 16     | 281.1  | 563.3   | 845.4   | 1127.5  | 1409.6  | 1691.8  | 1973.9  | 2256.0  | 2538.2  | 2820.3  | 3102.4  | 3384.6  |
|                       | 17     | 264.5  | 530.1   | 795.6   | 1061.1  | 1326.7  | 1592.2  | 1857.7  | 2123.3  | 2388.8  | 2654.3  | 2919.9  | 3185.4  |
|                       | 18     | 249.8  | 500.6   | 751.3   | 1002.1  | 1252.9  | 1503.7  | 1754.5  | 2005.2  | 2256.0  | 2506.8  | 2757.6  | 3008.4  |
|                       | 19     | 236.6  | 474.2   | 711.7   | 949.3   | 1186.9  | 1424.5  | 1662.1  | 1899.7  | 2137.2  | 2374.8  | 2612.4  | 2850.0  |
|                       | 20     | 224.7  | 450.4   | 676.1   | 901.8   | 1127.5  | 1353.2  | 1578.9  | 1804.6  | 2030.3  | 2256.0  | 2481.7  | 2707.4  |
|                       | 21     | 213.9  | 428.9   | 643.9   | 858.8   | 1073.8  | 1288.7  | 1503.7  | 1718.6  | 1933.6  | 2148.6  | 2363.5  | 2578.5  |
|                       | 22     | 204.2  | 409.4   | 614.5   | 819.7   | 1024.9  | 1230.1  | 1435.3  | 1640.5  | 1845.7  | 2050.8  | 2256.0  | 2461.2  |
|                       | 23     | 195.3  | 391.5   | 587.8   | 784.0   | 980.3   | 1176.6  | 1372.8  | 1569.1  | 1765.4  | 1961.6  | 2157.9  | 2354.2  |
|                       | 24     | 187.1  | 375.2   | 563.3   | 751.3   | 939.4   | 1127.5  | 1315.6  | 1503.7  | 1691.8  | 1879.9  | 2067.9  | 2256.0  |
|                       | 25     | 179.6  | 360.1   | 540.7   | 721.2   | 901.8   | 1082.4  | 1262.9  | 1443.5  | 1624.1  | 1804.6  | 1985.2  | 2165.8  |
|                       | 26     | 172.6  | 346.2   | 519.8   | 693.5   | 867.1   | 1040.7  | 1214.3  | 1387.9  | 1561.6  | 1735.2  | 1908.8  | 2082.4  |
|                       | 27     | 166.2  | 333.4   | 500.6   | 667.7   | 834.9   | 1002.1  | 1169.3  | 1336.5  | 1503.7  | 1670.9  | 1838.1  | 2005.2  |
|                       | 28     | 160.2  | 321.4   | 482.6   | 643.9   | 805.1   | 966.3   | 1127.5  | 1288.7  | 1449.9  | 1611.2  | 1772.4  | 1933.6  |
|                       | 29     | 154.7  | 310.3   | 466.0   | 621.6   | 777.3   | 932.9   | 1088.6  | 1244.3  | 1399.9  | 1555.6  | 1711.2  | 1866.9  |
|                       | 30     | 149.5  | 299.9   | 450.4   | 600.9   | 751.3   | 901.8   | 1052.3  | 1202.7  | 1353.2  | 1503.7  | 1654.2  | 1804.6  |
| observed <sup>a</sup> | 1503.4 | 1804.6 | 1936.9  | 2256.2  |         |         |         |         |         |         |         |         |         |
|                       | 1127.3 |        |         |         |         |         |         |         |         |         |         |         |         |

<sup>a</sup>Observed masses indicate red circles in Fig. 5A.

(continued)

WT-A β 42+E22P–AbD43

| n                     | 1          | 2       | 3       | 4        | 5        | 6        | 7        | 8        | 9        | 10       | 11       | 12       |          |
|-----------------------|------------|---------|---------|----------|----------|----------|----------|----------|----------|----------|----------|----------|----------|
| mass                  | 29064.7167 | 58129.4 | 87194.2 | 116258.9 | 145323.6 | 174388.3 | 203453.0 | 232517.7 | 261582.5 | 290647.2 | 319711.9 | 348776.6 |          |
| z                     | 1          | 29063.7 | 58128.4 | 87193.1  | 116257.9 | 145322.6 | 174387.3 | 203452.0 | 232516.7 | 261581.4 | 290646.2 | 319710.9 | 348775.6 |
|                       | 2          | 14531.4 | 29063.7 | 43596.1  | 58128.4  | 72660.8  | 87193.1  | 101725.5 | 116257.9 | 130790.2 | 145322.6 | 159854.9 | 174387.3 |
|                       | 3          | 9687.2  | 19375.5 | 29063.7  | 38751.9  | 48440.2  | 58128.4  | 67816.7  | 77504.9  | 87193.1  | 96881.4  | 106569.6 | 116257.9 |
|                       | 4          | 7265.2  | 14531.4 | 21797.5  | 29063.7  | 36329.9  | 43596.1  | 50862.2  | 58128.4  | 65394.6  | 72660.8  | 79927.0  | 87193.1  |
|                       | 5          | 5811.9  | 11624.9 | 17437.8  | 23250.8  | 29063.7  | 34876.7  | 40689.6  | 46502.5  | 52315.5  | 58128.4  | 63941.4  | 69754.3  |
|                       | 6          | 4843.1  | 9687.2  | 14531.4  | 19375.5  | 24219.6  | 29063.7  | 33907.8  | 38751.9  | 43596.1  | 48440.2  | 53284.3  | 58128.4  |
|                       | 7          | 4151.1  | 8303.2  | 12455.3  | 16607.4  | 20759.5  | 24911.6  | 29063.7  | 33215.8  | 37367.9  | 41520.0  | 45672.1  | 49824.2  |
|                       | 8          | 3632.1  | 7265.2  | 10898.3  | 14531.4  | 18164.4  | 21797.5  | 25430.6  | 29063.7  | 32696.8  | 36329.9  | 39963.0  | 43596.1  |
|                       | 9          | 3228.4  | 6457.8  | 9687.2   | 12916.6  | 16146.1  | 19375.5  | 22604.9  | 25834.3  | 29063.7  | 32293.1  | 35522.5  | 38751.9  |
|                       | 10         | 2905.5  | 5811.9  | 8718.4   | 11624.9  | 14531.4  | 17437.8  | 20344.3  | 23250.8  | 26157.2  | 29063.7  | 31970.2  | 34876.7  |
|                       | 11         | 2641.2  | 5283.5  | 7925.7   | 10568.0  | 13210.2  | 15852.5  | 18494.7  | 21137.0  | 23779.2  | 26421.5  | 29063.7  | 31706.0  |
|                       | 12         | 2421.1  | 4843.1  | 7265.2   | 9687.2   | 12109.3  | 14531.4  | 16953.4  | 19375.5  | 21797.5  | 24219.6  | 26641.6  | 29063.7  |
|                       | 13         | 2234.7  | 4470.5  | 6706.2   | 8942.0   | 11177.7  | 13413.5  | 15649.2  | 17885.0  | 20120.7  | 22356.5  | 24592.2  | 26828.0  |
|                       | 14         | 2075.0  | 4151.1  | 6227.1   | 8303.2   | 10379.2  | 12455.3  | 14531.4  | 16607.4  | 18683.5  | 20759.5  | 22835.6  | 24911.6  |
|                       | 15         | 1936.6  | 3874.3  | 5811.9   | 7749.6   | 9687.2   | 11624.9  | 13562.5  | 15500.2  | 17437.8  | 19375.5  | 21313.1  | 23250.8  |
|                       | 16         | 1815.5  | 3632.1  | 5448.6   | 7265.2   | 9081.7   | 10989.3  | 12714.8  | 14531.4  | 16347.9  | 18164.4  | 19981.0  | 21797.5  |
|                       | 17         | 1708.7  | 3418.4  | 5128.1   | 6837.7   | 8547.4   | 10257.1  | 11966.8  | 13676.5  | 15386.2  | 17095.9  | 18805.6  | 20515.3  |
|                       | 18         | 1613.7  | 3228.4  | 4843.1   | 6457.8   | 8072.5   | 9687.2   | 11301.9  | 12916.6  | 14531.4  | 16146.1  | 17760.8  | 19375.5  |
|                       | 19         | 1528.7  | 3058.4  | 4588.2   | 6117.9   | 7647.6   | 9177.3   | 10707.0  | 12236.8  | 13766.5  | 15296.2  | 16825.9  | 18355.7  |
|                       | 20         | 1452.2  | 2905.5  | 4358.7   | 5811.9   | 7265.2   | 8718.4   | 10171.6  | 11624.9  | 13078.1  | 14531.4  | 15984.6  | 17437.8  |
|                       | 21         | 1383.0  | 2767.1  | 4151.1   | 5535.1   | 6919.2   | 8303.2   | 9687.2   | 11071.3  | 12455.3  | 13839.3  | 15223.4  | 16607.4  |
|                       | 22         | 1320.1  | 2641.2  | 3962.4   | 5283.5   | 6604.6   | 7925.7   | 9246.9   | 10568.0  | 11889.1  | 13210.2  | 14531.4  | 15852.5  |
|                       | 23         | 1262.7  | 2526.4  | 3790.0   | 5053.7   | 6317.4   | 7581.1   | 8844.8   | 10108.5  | 11372.1  | 12635.8  | 13899.5  | 15163.2  |
|                       | 24         | 1210.0  | 2421.1  | 3632.1   | 4843.1   | 6054.1   | 7265.2   | 8476.2   | 9687.2   | 10898.3  | 12109.3  | 13320.3  | 14531.4  |
|                       | 25         | 1161.6  | 2324.2  | 3486.8   | 4649.3   | 5811.9   | 6974.5   | 8137.1   | 9299.7   | 10462.3  | 11624.9  | 12787.5  | 13950.1  |
|                       | 26         | 1116.9  | 2234.7  | 3352.6   | 4470.5   | 5588.4   | 6706.2   | 7824.1   | 8942.0   | 10059.9  | 11177.7  | 12295.6  | 13413.5  |
|                       | 27         | 1075.5  | 2151.9  | 3228.4   | 4304.9   | 5381.3   | 6457.8   | 7534.3   | 8610.8   | 9687.2   | 10763.7  | 11840.2  | 12916.6  |
|                       | 28         | 1037.0  | 2075.0  | 3113.1   | 4151.1   | 5189.1   | 6227.1   | 7265.2   | 8303.2   | 9341.2   | 10379.2  | 11417.3  | 12455.3  |
|                       | 29         | 1001.2  | 2003.5  | 3005.7   | 4007.9   | 5010.2   | 6012.4   | 7014.6   | 8016.8   | 9019.1   | 10021.3  | 11023.5  | 12025.8  |
|                       | 30         | 967.8   | 1936.6  | 2905.5   | 3874.3   | 4843.1   | 5811.9   | 6780.8   | 7749.6   | 8718.4   | 9687.2   | 10656.1  | 11624.9  |
|                       | 31         | 936.6   | 1874.1  | 2811.7   | 3749.3   | 4686.8   | 5624.4   | 6562.0   | 7499.6   | 8437.1   | 9374.7   | 10312.3  | 11249.9  |
|                       | 32         | 907.3   | 1815.5  | 2723.8   | 3632.1   | 4540.4   | 5448.6   | 6356.9   | 7265.2   | 8173.4   | 9081.7   | 9990.0   | 10898.3  |
|                       | 33         | 879.7   | 1760.5  | 2641.2   | 3522.0   | 4402.7   | 5283.5   | 6164.2   | 7045.0   | 7925.7   | 8806.5   | 9687.2   | 10568.0  |
|                       | 34         | 853.8   | 1708.7  | 2563.5   | 3418.4   | 4273.2   | 5128.1   | 5982.9   | 6837.7   | 7692.6   | 8547.4   | 9402.3   | 10257.1  |
|                       | 35         | 829.4   | 1659.8  | 2490.3   | 3320.7   | 4151.1   | 4981.5   | 5811.9   | 6642.4   | 7472.8   | 8303.2   | 9133.6   | 9964.0   |
|                       | 36         | 806.3   | 1613.7  | 2421.1   | 3228.4   | 4035.8   | 4843.1   | 5650.5   | 6457.8   | 7265.2   | 8072.5   | 8879.9   | 9687.2   |
|                       | 37         | 784.5   | 1570.1  | 2355.6   | 3141.1   | 3926.7   | 4712.2   | 5497.7   | 6283.3   | 7068.8   | 7854.3   | 8639.9   | 9425.4   |
|                       | 38         | 763.9   | 1528.7  | 2293.6   | 3058.4   | 3823.3   | 4588.2   | 5353.0   | 6117.9   | 6882.7   | 7647.6   | 8412.5   | 9177.3   |
|                       | 39         | 744.2   | 1489.5  | 2234.7   | 2980.0   | 3725.2   | 4470.5   | 5215.7   | 5961.0   | 6706.2   | 7451.5   | 8196.7   | 8942.0   |
|                       | 40         | 725.6   | 1452.2  | 2178.8   | 2905.5   | 3632.1   | 4358.7   | 5085.3   | 5811.9   | 6538.6   | 7265.2   | 7991.6   | 8718.4   |
|                       | 41         | 707.9   | 1416.8  | 2125.7   | 2834.6   | 3543.5   | 4252.4   | 4961.3   | 5670.2   | 6379.1   | 7087.9   | 7796.8   | 8505.7   |
|                       | 42         | 691.0   | 1383.0  | 2075.0   | 2767.1   | 3459.1   | 4151.1   | 4843.1   | 5535.1   | 6227.1   | 6919.2   | 7611.2   | 8303.2   |
|                       | 43         | 674.9   | 1350.8  | 2026.8   | 2702.7   | 3378.6   | 4054.5   | 4730.5   | 5406.4   | 6082.3   | 6758.2   | 7434.2   | 8110.1   |
|                       | 44         | 659.6   | 1320.1  | 1980.7   | 2641.2   | 3301.8   | 3962.4   | 4622.9   | 5283.5   | 5944.0   | 6604.6   | 7265.2   | 7925.7   |
|                       | 45         | 644.9   | 1290.8  | 1936.6   | 2582.5   | 3228.4   | 3874.3   | 4520.2   | 5166.1   | 5811.9   | 6457.8   | 7103.7   | 7749.6   |
|                       | 46         | 630.8   | 1262.7  | 1894.5   | 2526.4   | 3158.2   | 3790.0   | 4421.9   | 5053.7   | 5685.6   | 6317.4   | 6949.3   | 7581.1   |
|                       | 47         | 617.4   | 1235.8  | 1854.2   | 2472.6   | 3091.0   | 3709.4   | 4327.8   | 4946.2   | 5564.6   | 6183.0   | 6801.4   | 7419.8   |
|                       | 48         | 604.5   | 1210.0  | 1815.5   | 2421.1   | 3026.6   | 3632.1   | 4237.6   | 4843.1   | 5448.6   | 6054.1   | 6659.7   | 7265.2   |
|                       | 49         | 592.1   | 1185.3  | 1778.5   | 2371.6   | 2964.8   | 3557.9   | 4151.1   | 4744.3   | 5337.4   | 5930.6   | 6523.7   | 7116.9   |
|                       | 50         | 580.3   | 1161.6  | 1742.9   | 2324.2   | 2905.5   | 3486.8   | 4068.1   | 4649.3   | 5230.6   | 5811.9   | 6393.2   | 6974.5   |
|                       | 51         | 568.9   | 1138.8  | 1708.7   | 2278.6   | 2848.5   | 3418.4   | 3988.3   | 4558.2   | 5128.1   | 5698.0   | 6267.9   | 6837.7   |
|                       | 52         | 557.9   | 1116.9  | 1675.8   | 2234.7   | 2793.7   | 3352.6   | 3911.6   | 4470.5   | 5029.4   | 5588.4   | 6147.3   | 6706.2   |
|                       | 53         | 547.4   | 1095.8  | 1644.2   | 2192.6   | 2740.9   | 3289.3   | 3837.7   | 4386.1   | 4934.5   | 5482.9   | 6031.3   | 6579.7   |
|                       | 54         | 537.2   | 1075.5  | 1613.7   | 2151.9   | 2690.2   | 3228.4   | 3766.6   | 4304.9   | 4843.1   | 5381.3   | 5919.6   | 6457.8   |
|                       | 55         | 527.4   | 1055.9  | 1584.3   | 2112.8   | 2641.2   | 3169.7   | 3698.1   | 4226.6   | 4755.0   | 5283.5   | 5811.9   | 6340.4   |
|                       | 56         | 518.0   | 1037.0  | 1556.0   | 2075.0   | 2594.1   | 3113.1   | 3632.1   | 4151.1   | 4670.1   | 5189.1   | 5708.1   | 6227.1   |
|                       | 57         | 508.9   | 1018.8  | 1528.7   | 2038.6   | 2548.5   | 3058.4   | 3568.3   | 4078.3   | 4588.2   | 5098.1   | 5608.0   | 6117.9   |
|                       | 58         | 500.1   | 1001.2  | 1502.3   | 2003.5   | 2504.6   | 3005.7   | 3506.8   | 4007.9   | 4509.0   | 5010.2   | 5511.3   | 6012.4   |
|                       | 59         | 491.6   | 984.2   | 1476.9   | 1969.5   | 2462.1   | 2954.7   | 3447.3   | 3940.0   | 4432.6   | 4925.2   | 5417.8   | 5910.5   |
|                       | 60         | 483.4   | 967.8   | 1452.2   | 1936.6   | 2421.1   | 2905.5   | 3389.9   | 3874.3   | 4358.7   | 4843.1   | 5327.5   | 5811.9   |
| observed <sup>b</sup> | 1610.4     | 2154.0  | 2354.9  |          |          |          |          |          |          |          |          |          |          |
|                       |            | 1873.7  | 1981.7  |          |          |          |          |          |          |          |          |          |          |

<sup>b</sup>Observed masses indicate blue circles in Fig. 5B.
